# Supplementary material for: Long non-coding RNAs MACC1-AS1 and FOXD2-AS1 mediate NSD2-induced cisplatin resistance in esophageal squamous cell carcinoma
Source: PubMed Central journal article supplement — Mol Ther Nucleic Acids. 2020 Dec 10;23:592–602. doi: 10.1016/j.omtn.2020.12.007 (PMC7819824; doi:10.1016/j.omtn.2020.12.007), 2020-12-10
Supplement: mmc1.pdf [file mmc1.pdf]

OMTN, Volume 23

## **Supplemental Information**

### **Long non-coding RNAs MACC1-AS1 and FOXD2-AS1 mediate NSD2-induced cisplatin resistance in esophageal squamous cell carcinoma**

**Wenhua Xue, Zhibo Shen, Lifeng Li, Yuanyuan Zheng, Dan Yan, Quancheng Kan, and Jie Zhao**

**Supplementary Table S1. PCR primers used in this study.**

---

| <b>Gene</b>                               | <b>Primer sequence (5'-3')</b>                                      |
|-------------------------------------------|---------------------------------------------------------------------|
| <b>Primers for quantitative PCR assay</b> |                                                                     |
| NSD1                                      | Forward: CCAGGGACAAGGCAAAAGTTG<br>Reverse: CAGTAACAGGGTAAAGCAGACA   |
| NSD2                                      | Forward: CCATCCTAGTGAGAAGCTGG<br>Reverse: CCCCAAATGTTGATAAGAACC     |
| NSD3                                      | Forward: GTTGAAGGAAGAAGTGAACAT<br>Reverse: GGCTGCTTCAGCCTTCCAGGA    |
| MACC1-AS1                                 | Forward: GAACCCTGCACTTGAACAACA<br>Reverse: GACTGGCCGCTGGAGAGTTC     |
| FOXD2-AS1                                 | Forward: GCGAAGAGTACGTTGCTATCA<br>Reverse: GCGTGCAATCGTTCCGCTGTG    |
| DANCR                                     | Forward: CTCCAGGAGTTCGTCTCTTAC<br>Reverse: AGGATAGTTGGCTTAAGTCA     |
| TGFA                                      | Forward: CCTGGCTGTCCTTATCATCAC<br>Reverse: GGCACCACTCACAGTGTTTTTC   |
| PAK1                                      | Forward: GGTTTCAAGTGTTTAGTAACTTTTC<br>Reverse: TTAGCTGCAGCAATCAGTGG |
| MET                                       | Forward: GAGGAAGACCTTCAGAAGGT<br>Reverse: CAACTAGAGCCATGTTGATG      |

---

---

GAPDH                      Forward: ACCACAGTCCATGCCATCAC  
Reverse: TCCACCACCCTGTTGCTGTA

**Primers for ChIP assay**

*MACC1-ASI*                      Forward: GTGTTTGCATGAGCATGCCAAC  
promoter

Reverse: GTGAGACTTGCTACTCTTTTTCA

*FOXD2-ASI*                      Forward: GGAGTACAGAATCCCCAGCTTC  
promoter

Reverse: CCTCTATACAGAGAGGAGCTC

*DANCR* promoter                      Forward: GGCTTCTCTTTAAGCTTACGGT  
Reverse: GCGCGGAGCATCCTTCTCTGA

---

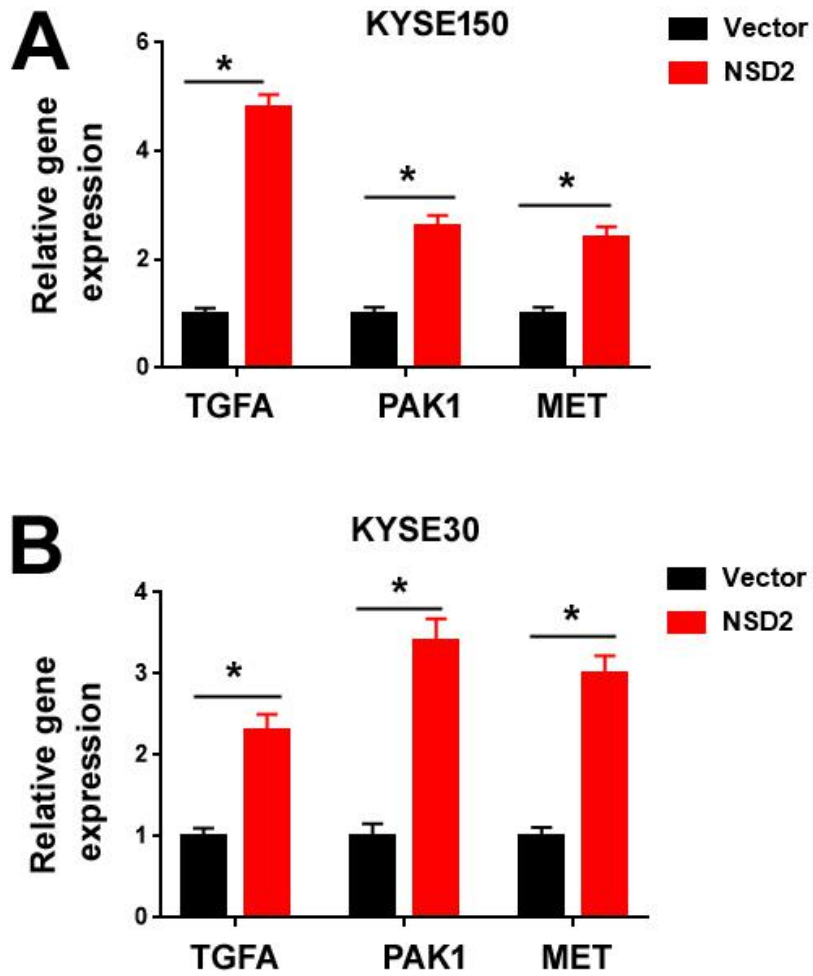

Supplementary Figure S1. Effect of NSD2 overexpression on target gene expression.

Analysis of TGFA, PAK1, and MET in (A) KYSE150 and (B) KYSE30 cells transfected with empty vector or NSD2-expressing plasmid. \* $P < 0.05$ .

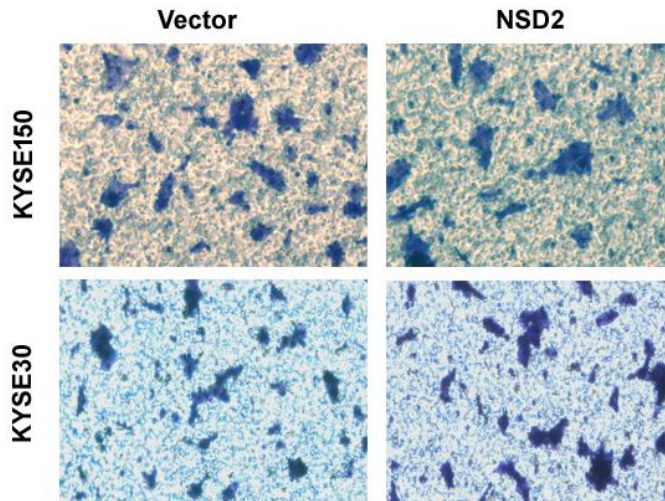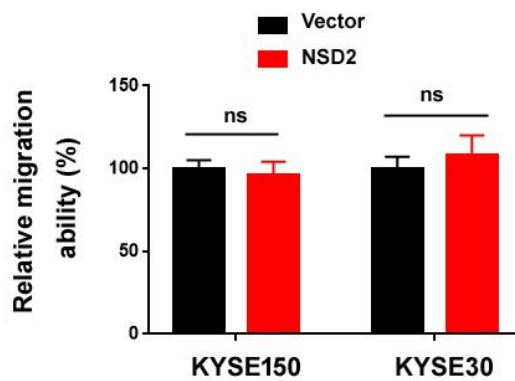

Supplementary Figure S2. Effect of NSD2 overexpression on ESCC cell migration. KYSE150 and KYSE30 cells transfected with empty vector or NSD2-expressing plasmid were plated on the upper compartment of the Transwell chamber. The lower compartment was filled with serum-containing medium. After culturing for 24 h, the cells that migrated to the lower compartment were stained and counted. Upper: representative images of migrated cells. Bottom: bar graphs showing quantitative results from three independent experiments. ns indicates no significance.
